# Supplementary material
Source: PubMed Central journal article supplement (PMC7643536)
Supplement: kfaa049_supplementary_data.pdf [file kfaa049_supplementary_data.pdf]

## Tissue-engineered human myobundle system as a platform for evaluation of skeletal muscle injury biomarkers.

Alastair Khodabukus<sup>1#</sup>, Amulya Kaza<sup>1#</sup>, Jason Wang<sup>1</sup>, Neel Prabhu<sup>1</sup>, Richard Goldstein<sup>2</sup>, Vishal Vaidya<sup>2</sup>, and Nenad Bursac<sup>1</sup>

<sup>1</sup> Department of Biomedical Engineering, Duke University, Durham, NC, USA

<sup>2</sup> Drug Research and Development, Pfizer, Groton, CT, USA

#Equally contributing authors

\*Corresponding author:

101 Science Drive

FCIEMAS 1427

Durham, NC27708-90281

phone: 1-919-660-5510

fax: 1-919-684-4488

E-mail: [nbursac@duke.edu](mailto:nbursac@duke.edu)

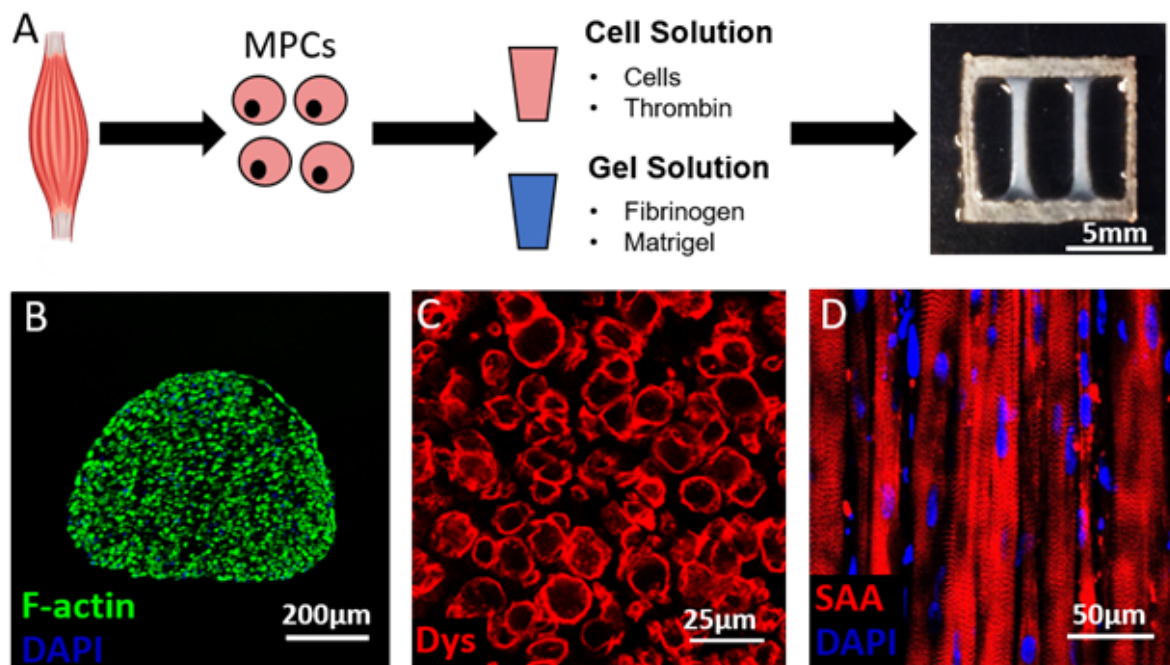

**Supplementary Figure 1. Human myobundle system.** (A) Human muscle progenitor cells (MPCs) are isolated from muscle biopsies and expanded in culture for 5 passages. Expanded MPCs are embedded at high density in a fibrin/matrigel hydrogel and cast in molds to form pairs of cylindrically shaped tissues (myobundles) anchored to a supporting Cerex® frame. (B) Representative myobundle cross-sectional image stained for filamentous-actin (F-actin) and nuclei (DAPI). (C) Representative myobundle cross-sectional image at higher magnification showing myofibers stained for dystrophin (Dys). (D) Representative whole-myobundle image showing aligned myofibers stained for sarcomeric alpha-actinin (SAA) and nuclei (DAPI).
